# Supplementary material for: Transcriptional Responses to Long-term Salinity Stress and Acclimation in the Black Mussel, Mytilus Galloprovincialis
Source: Research Square preprint supplement (doi:10.21203/rs.3.rs-1536907/v1), 2022-04-21
Supplement: Supplementary file 1 [file 15b2a6272b8234846d3bf95d.xlsx]

## Sheet: TOP50_Summary
	Supplementary Table S4. Top 50 enriched GOs by NES scores of GSEA.
			RTvsRC.BA	RTvsRC.CB	RTvsRC.DC
	Nucleotide Metabolism	Biological Process			ribonucleoside triphosphate metabolic process (GO:0009199) ribonucleoside triphosphate biosynthetic process (GO:0009201) purine ribonucleoside triphosphate metabolic process (GO:0009205) nucleoside triphosphate biosynthetic process (GO:0009142) purine nucleoside triphosphate biosynthetic process (GO:0009145)
		Cellular Component
		Molecular Function	nucleoside-triphosphatase regulator activity (GO:0060589) GTPase regulator activity (GO:0030695)
	Oxidative Phosphorylation	Biological Process			energy coupled proton transport, down electrochemical gradient (GO:0015985) ATP biosynthetic process (GO:0006754) ATP synthesis coupled proton transport (GO:0015986)
		Cellular Component			mitochondrial protein-containing complex (GO:0098798) proton-transporting ATP synthase complex (GO:0045259) respiratory chain complex (GO:0098803) respirasome (GO:0070469) mitochondrial matrix (GO:0005759) proton-transporting ATP synthase complex, coupling factor F(o) (GO:0045263)
		Molecular Function
	Cilliary Activity	Biological Process	cell projection assembly (GO:0030031) cell projection organization (GO:0030030) plasma membrane bounded cell projection assembly (GO:0120031) plasma membrane bounded cell projection organization (GO:0120036) cilium assembly (GO:0060271) cilium organization (GO:0044782) exocytosis (GO:0006887)	cilium assembly (GO:0060271) cell projection assembly (GO:0030031) cilium organization (GO:0044782) plasma membrane bounded cell projection assembly (GO:0120031) plasma membrane bounded cell projection organization (GO:0120036) cell projection organization (GO:0030030) exocytosis (GO:0006887) regulation of postsynaptic membrane potential (GO:0060078) regulation of membrane potential (GO:0042391)
		Cellular Component	plasma membrane bounded cell projection (GO:0120025) cilium (GO:0005929)	cilium (GO:0005929)	cilium (GO:0005929)
		Molecular Function		transmitter-gated ion channel activity (GO:0022824) transmitter-gated channel activity (GO:0022835) neurotransmitter receptor activity (GO:0030594)
	Gene Expression Regulation	Biological Process	mRNA metabolic process (GO:0016071) mRNA processing (GO:0006397) RNA splicing (GO:0008380) RNA splicing, via transesterification reactions with bulged adenosine as nucleophile (GO:0000377) mRNA splicing, via spliceosome (GO:0000398) RNA splicing, via transesterification reactions (GO:0000375) ncRNA metabolic process (GO:0034660) RNA catabolic process (GO:0006401) negative regulation of gene expre…	mRNA processing (GO:0006397) RNA splicing via transesterification reactions (GO:0000375) RNA splicing (GO:0008380) RNA splicing via transesterification reactions with bulged adenosine as nucleophile (GO:0000377) mRNA splicing via spliceosome (GO:0000398) mRNA metabolic process (GO:0016071) positive regulation of transcription DNA-templated (GO:0045893) regulation of transcription by RNA polymeras…	mRNA processing (GO:0006397) ncRNA metabolic process (GO:0034660) RNA modification (GO:0009451) mRNA metabolic process (GO:0016071) ncRNA processing (GO:0034470) histone methylation (GO:0016571)
		Cellular Component			spliceosomal complex (GO:0005681) DNA-directed RNA polymerase complex (GO:0000428)
		Molecular Function
	DNA Damage and Repair	Biological Process			DNA repair (GO:0006281) cellular response to DNA damage stimulus (GO:0006974)
		Cellular Component
		Molecular Function
	Protein Metabolism	Biological Process	cellular protein catabolic process (GO:0044257) protein catabolic process (GO:0030163) proteolysis involved in cellular protein catabolic process (GO:0051603) ubiquitin-dependent protein catabolic process (GO:0006511) modification-dependent macromolecule catabolic process (GO:0043632) proteasomal protein catabolic process (GO:0010498) modification-dependent protein catabolic process (GO:0019941) …	intracellular protein transport (GO:0006886) Golgi vesicle transport (GO:0048193) export from cell (GO:0140352) secretion by cell (GO:0032940) exocytosis (GO:0006887) cotranslational protein targeting to membrane (GO:0006613) protein homooligomerization (GO:0051260)	lipoprotein metabolic process (GO:0042157) tRNA modification (GO:0006400) tRNA processing (GO:0008033) ribonucleoprotein complex biogenesis (GO:0022613) macromolecule methylation (GO:0043414) methylation (GO:0032259) protein methylation (GO:0006479) protein alkylation (GO:0008213)
		Cellular Component	endopeptidase complex (GO:1905369) proteasome complex (GO:0000502) peptidase complex (GO:1905368) ubiquitin ligase complex (GO:0000151) proteasome core complex (GO:0005839) endoplasmic reticulum (GO:0005783) nuclear outer membrane-endoplasmic reticulum membrane network (GO:0042175) endoplasmic reticulum membrane (GO:0005789) endoplasmic reticulum subcompartment (GO:0098827) peroxisome (GO:0005777…	proteasome complex (GO:0000502) endopeptidase complex (GO:1905369) endoplasmic reticulum (GO:0005783) Golgi membrane (GO:0000139)	proteasome complex (GO:0000502) endopeptidase complex (GO:1905369) peptidase complex (GO:1905368) ribosomal subunit (GO:0044391) large ribosomal subunit (GO:0015934) endoplasmic reticulum protein-containing complex (GO:0140534) transferase complex (GO:1990234)
		Molecular Function	catalytic activity, acting on a tRNA (GO:0140101)	catalytic activity acting on a tRNA (GO:0140101) transferase activity transferring acyl groups (GO:0016746) transferase activity transferring acyl groups other than amino-acyl groups (GO:0016747)	S-adenosylmethionine-dependent methyltransferase activity (GO:0008757) methyltransferase activity (GO:0008168) transferase activity, transferring one-carbon groups (GO:0016741) transferase activity, transferring alkyl or aryl (other than methyl) groups (GO:0016765)
	Ion Channels and Transporters	Biological Process	metal ion transport (GO:0030001)	regulation of postsynaptic membrane potential (GO:0060078) regulation of membrane potential (GO:0042391) potassium ion transport (GO:0006813)
		Cellular Component
		Molecular Function	cation channel activity (GO:0005261)	transmitter-gated ion channel activity (GO:0022824) transmitter-gated channel activity (GO:0022835) neurotransmitter receptor activity (GO:0030594) cation channel activity (GO:0005261)
	Others	Biological Process	cellular response to organonitrogen compound (GO:0071417) exocytosis (GO:0006887) organelle assembly (GO:0070925) metal ion transport (GO:0030001)	response to organic substance (GO:0010033) isoprenoid biosynthetic process (GO:0008299) exocytosis (GO:0006887) potassium ion transport (GO:0006813)	cellular protein-containing complex assembly (GO:0034622)
		Cellular Component	organelle subcompartment (GO:0031984) microbody (GO:0042579) intracellular protein-containing complex (GO:0140535)	spindle pole (GO:0000922) synapse (GO:0045202) organelle subcompartment (GO:0031984) intracellular protein-containing complex (GO:0140535)	oxidoreductase complex (GO:1990204) organelle inner membrane (GO:0019866) intracellular protein-containing complex (GO:0140535)
		Molecular Function	cation channel activity (GO:0005261)	signaling receptor binding (GO:0005102) G protein-coupled peptide receptor activity (GO:0008528) peptide receptor activity (GO:0001653) magnesium ion binding (GO:0000287) protein serine/threonine kinase activity (GO:0004674) cation channel activity (GO:0005261)	4 iron, 4 sulfur cluster binding (GO:0051539) ligase activity (GO:0016874)
